# Supplementary material for: Study of the Risk and Preventive Factors for Progress of Mild Cognitive Impairment to Dementia
Source: PubMed Central journal article supplement — Am J Alzheimers Dis Other Demen. 2020 Jun 22;35:1533317520925324. doi: 10.1177/1533317520925324 (PMC10624080; doi:10.1177/1533317520925324), 2020-06-22
Supplement: Supplementary_Table_1.pdf [file Supplementary_Table_1.pdf]

**Supplementary Table 1.** The variable assignment of ordered logistic regression analysis

| variable | Fctors                     | Assignment                                                                                                                |
|----------|----------------------------|---------------------------------------------------------------------------------------------------------------------------|
| X1       | Age                        | >60 years=1, ≤60 years=2                                                                                                  |
| X2       | Family history of dementia | Yes=1, No=2                                                                                                               |
| X3       | Memory decline complaint   | Yes =1, No =2                                                                                                             |
| X4       | Diabetes                   | Yes =1, No =2                                                                                                             |
| X5       | Hypertension               | Yes =1, No =2                                                                                                             |
| X6       | Hyperlipemia               | Yes =1, No =2                                                                                                             |
| X7       | Gender                     | Male=1, Female=2                                                                                                          |
| X8       | Marriage                   | Marriage=1, others=2                                                                                                      |
| X9       | Health insurance           | City medical insurance =1, Town medical insurance =2, Resident medical insurance =3, Cooperative medical care =4, other=5 |
| X10      | Care method                | Someone else =1, family member =2                                                                                         |
| X11      | Care frequency             | Occasionally =1, others=2                                                                                                 |
| X12      | BMI (≥28.0)                | BMI(<24.0)=1; BMI (24.0-27.9) =2; BMI (≥28.0) =3                                                                          |
| X13      | Personality                | Introverted personality =1, Outward personality =2, Neutral personality =3                                                |
| X14      | Education                  | illiteracy =1, Primary school =2, Junior high school=3, High/secondary school =4, College degree =5, Bachelor or above =6 |
| X15      | Past occupation            | Technical staff =1, Manager=2, Clerk =3, Businessman =4, Service staff =5, Peasant =6, Worker=7, others=8                 |
| X16      | Homestyle                  | living alone=1, Core family=2, Stem family=3                                                                              |
| X17      | Economic income            | <1300 Yuan/month =1, ≤2000 Yuan/month =2, ≤4000V=3, >4000 Yuan/month =4                                                   |
